# Supplementary material
Source: MDPI journal article supplement (https://www.mdpi.com/2199-8531/7/4/218)
Supplement: s1 [file s1]

**Table S1.** The factors influencing VC supply, demand and total market activity.

| Metacategory                           | Group                                    | Factor                                          | Driver                                                   | Drivers influence on |                      |          |
|----------------------------------------|------------------------------------------|-------------------------------------------------|----------------------------------------------------------|----------------------|----------------------|----------|
|                                        |                                          |                                                 |                                                          | Supply               | Demand               | Matching |
| Factors related to actors of VC market | Factors related to VC firms              | Total amount of available capital from VC firms |                                                          |                      |                      |          |
|                                        |                                          |                                                 | High amount of total VC                                  |                      | ↑                    |          |
|                                        |                                          | Number of VC firms                              | High competition between VC firms in a particular stage  | Varied influence     | Negligible influence |          |
|                                        |                                          |                                                 | Existence of VC firms in all stages                      | ↑                    | ↑                    | ↑        |
|                                        |                                          | Characteristics of VC firms                     | Existence of local VC firms                              | ↑                    | ↑                    | ↑        |
|                                        |                                          |                                                 | Existence of foreign VC firms in a market                | ↑                    | ↑                    |          |
|                                        |                                          |                                                 | Publicly co-financed VC firms                            | ↑                    | ↑                    |          |
|                                        |                                          |                                                 | Decreasing influence on returns                          |                      |                      |          |
|                                        |                                          |                                                 | Decreasing influence on added value                      |                      |                      |          |
|                                        |                                          |                                                 | Private VC firms                                         | ↑                    | ↑                    |          |
|                                        |                                          |                                                 | High reputation                                          |                      | ↑                    | ↑        |
|                                        |                                          |                                                 | Experienced VC firms                                     | ↑                    | ↑                    |          |
|                                        |                                          |                                                 | Substantial added value from VC firms                    |                      | ↑                    | ↑        |
|                                        |                                          |                                                 | High investment returns of VC firms                      | ↑                    |                      |          |
|                                        |                                          |                                                 | Successful growth of VC firms' portfolio companies       |                      | ↑                    | ↑        |
|                                        | Factors related to investors in VC funds | Base of institutional investors                 | Diversified and robust institutional investor base       | ↑                    |                      |          |
|                                        |                                          | Private entrepreneurs                           | Successful entrepreneurs from prior generations          | ↑                    |                      |          |
|                                        | Factors related to entrepreneurs         | The number of entrepreneurs seeking for VC      | High amount of entrepreneurs seeking for VC              | ↑                    |                      |          |
|                                        |                                          | Entrepreneur's characteristics                  | General awareness about VC                               |                      | ↑                    | ↑        |
|                                        |                                          |                                                 | Understanding the added value from VC                    |                      | ↑                    | ↑        |
|                                        |                                          |                                                 | High risk tolerance and partnership acceptance and trust |                      | ↑                    |          |
|                                        |                                          |                                                 | Gender – male                                            |                      | ↑                    | ↑        |

|             |                     |                                                      |                                                                                                                   |   |                  |   |
|-------------|---------------------|------------------------------------------------------|-------------------------------------------------------------------------------------------------------------------|---|------------------|---|
| Environment | Legal environment   | General legal environment                            | High net worth of entrepreneurs                                                                                   |   | ↑                | ↑ |
|             |                     |                                                      | Previous experience in the entrepreneurship                                                                       |   |                  | ↑ |
|             |                     |                                                      | Technical or MBA education                                                                                        |   | ↑                | ↑ |
|             |                     | Legal environment for LPs                            | Internationally harmonized and stable regulation for securities, bancruptcy, labor and tax                        | ↑ | ↑                |   |
|             |                     |                                                      | Flexible policies regarding risk evaluation and broad limits for investments in VC funds                          | ↑ |                  |   |
|             |                     |                                                      | Tax application on LPs not VC fund level                                                                          | ↑ |                  |   |
|             |                     | Legal environment for VC funds                       | Broad limits of VC funds (size of the investment; geography; focus; life span of the fund; risk profile)          | ↑ | ↑                | ↑ |
|             |                     | Legal environment for entrepreneurs                  | Entrepreneur friendly tax application and little administrative burden for starting a business                    |   | ↑                |   |
|             |                     | Legal environment for particular kind of investments | Government policies and regulations beneficial for particular kind of investments (i.e. clentech; sustainability) |   | ↑                |   |
|             | Government policies | General                                              | Programmes encouraging entrepreneurship                                                                           |   | ↑                |   |
|             |                     |                                                      | Raising awareness about financial instruments                                                                     |   | ↑                |   |
|             |                     |                                                      | Support for Technology Transfer and RD                                                                            |   | ↑                |   |
|             |                     |                                                      | Outsourcing public services                                                                                       |   | ↑                |   |
|             |                     | For VC funds                                         | Providing public funding for VC funds                                                                             | ↑ |                  |   |
|             |                     |                                                      | Raising awareness about VC                                                                                        |   | ↑                |   |
|             |                     |                                                      | Alternative IPO and listing regulation for SMEs with less stringent standards                                     | ↑ |                  |   |
|             |                     |                                                      | Similarity between domestic and foreign policy                                                                    | ↑ |                  |   |
|             | Infrastructure      | General infrastructure                               | Developed infrastructure                                                                                          | ↑ | ↑                |   |
|             |                     |                                                      | High development of IC industry                                                                                   | ↑ | ↑                |   |
|             |                     | Research facilities                                  | Existing and available research facilities                                                                        |   | ↑                |   |
|             |                     | Local Universities                                   | Existence of local technical universities                                                                         |   | ↑                |   |
|             |                     | Capital market                                       | Capital market providing exit possibilities                                                                       | ↑ | ↑                |   |
|             |                     |                                                      | Absence of other available capital                                                                                |   | Varied influence | ↑ |

|                  |                            |                                                   |                                                                                  |   |   |   |
|------------------|----------------------------|---------------------------------------------------|----------------------------------------------------------------------------------|---|---|---|
|                  |                            |                                                   | Possibility to get additional funding for next rounds/further growth             | ↑ |   |   |
|                  |                            |                                                   | Low transaction costs                                                            | ↑ |   | ↑ |
|                  |                            |                                                   | Lack of other high yield investment for LPs options                              | ↑ |   |   |
|                  |                            | Domestic VC ecosystem                             | Developed ecosystem with consultants and business angels                         | ↑ | ↑ | ↑ |
|                  | Envinronment for inovation | Technology innovations                            | High level of technology innovation                                              | ↑ |   | ↑ |
|                  |                            | Demand for new products                           | High level of demand for new products                                            | ↑ |   | ↑ |
|                  |                            | Demand for particular products/technologies       | High level of demand for particular products/technologies                        |   | ↑ |   |
|                  |                            | State R&D expenses                                | High level of state R&D expenses                                                 |   |   | ↑ |
|                  | Resources                  | Human resources                                   | High diversity of economically active persons (nationality, gender)              |   | ↑ |   |
|                  |                            |                                                   | High unemployment                                                                |   | ↑ |   |
|                  |                            |                                                   | High student rate                                                                | ↑ |   |   |
|                  |                            |                                                   | Availability of technically skilled entrepreneurs and personel                   |   | ↑ |   |
|                  |                            |                                                   | Availability of economically competent individuals                               |   | ↑ |   |
|                  | Macroeconomic conditions   |                                                   | High GDP and export                                                              | ↑ | ↑ | ↑ |
| Embedded factors | Geografical location       |                                                   | Close location to core economical regions                                        | ↑ | ↑ |   |
|                  |                            |                                                   | Close location to countries with a high VC activity                              | ↑ |   |   |
|                  | Social norms               | Attitude to risk, uncertainty, cooperation, trust | High level of risk and uncertainty toleration, tendency to cooperation and trust | ↑ | ↑ | ↑ |
