# Supplementary material
Source: MDPI journal article supplement (https://www.mdpi.com/2199-8531/7/4/218)
Supplement: s1 [file s1]

**Table S2**

Correlations between factors exposure on the supply, demand side and matching.

|       |                                        | q11_1  | q11_2  | q11_3  |
|-------|----------------------------------------|--------|--------|--------|
| q11_1 | Pearson Correlation                    | 1      | .676** | .822** |
|       | Sig. (2-tailed)                        |        | .001   | .000   |
|       | N                                      | 21     | 21     | 21     |
|       | Spearman's rho Correlation Coefficient | 1.000  | .621** | .793** |
|       | Sig. (2-tailed)                        |        | .003   | .000   |
|       | N                                      | 21     | 21     | 21     |
| q11_2 | Pearson Correlation                    | .676** | 1      | .759** |
|       | Sig. (2-tailed)                        | .001   |        | .000   |
|       | N                                      | 21     | 21     | 21     |
|       | Spearman's rho Correlation Coefficient | .621** | 1.000  | .697** |
|       | Sig. (2-tailed)                        | .003   |        | .000   |
|       | N                                      | 21     | 21     | 21     |
| q11_3 | Pearson Correlation                    | .822** | .759** | 1      |
|       | Sig. (2-tailed)                        | .000   | .000   |        |
|       | N                                      | 21     | 21     | 21     |
|       | Spearman's rho Correlation Coefficient | .793** | .697** | 1.000  |
|       | Sig. (2-tailed)                        | .000   | .000   |        |
|       | N                                      | 21     | 21     | 21     |

|       |                                        | q12_1 | q12_2  | q12_3  |
|-------|----------------------------------------|-------|--------|--------|
| q12_1 | Pearson Correlation                    | 1     | .322   | .369   |
|       | Sig. (2-tailed)                        |       | .155   | .100   |
|       | N                                      | 21    | 21     | 21     |
|       | Spearman's rho Correlation Coefficient | 1.000 | .357   | .325   |
|       | Sig. (2-tailed)                        |       | .112   | .150   |
|       | N                                      | 21    | 21     | 21     |
| q12_2 | Pearson Correlation                    | .322  | 1      | .588** |
|       | Sig. (2-tailed)                        | .155  |        | .005   |
|       | N                                      | 21    | 21     | 21     |
|       | Spearman's rho Correlation Coefficient | .357  | 1.000  | .588** |
|       | Sig. (2-tailed)                        | .112  |        | .005   |
|       | N                                      | 21    | 21     | 21     |
| q12_3 | Pearson Correlation                    | .369  | .588** | 1      |
|       | Sig. (2-tailed)                        | .100  | .005   |        |
|       | N                                      | 21    | 21     | 21     |
|       | Spearman's rho Correlation Coefficient | .325  | .588** | 1.000  |
|       | Sig. (2-tailed)                        | .150  | .005   |        |
|       | N                                      | 21    | 21     | 21     |

|       |                                        | q13_1  | q13_2  | q13_3  |
|-------|----------------------------------------|--------|--------|--------|
| q13_1 | Pearson Correlation                    | 1      | .586** | .787** |
|       | Sig. (2-tailed)                        |        | .005   | .000   |
|       | N                                      | 21     | 21     | 21     |
|       | Spearman's rho Correlation Coefficient | 1.000  | .577** | .818** |
|       | Sig. (2-tailed)                        |        | .006   | .000   |
|       | N                                      | 21     | 21     | 21     |
| q13_2 | Pearson Correlation                    | .586** | 1      | .642** |
|       | Sig. (2-tailed)                        | .005   |        | .002   |
|       | N                                      | 21     | 21     | 21     |
|       | Spearman's rho Correlation Coefficient | .577** | 1.000  | .611** |
|       | Sig. (2-tailed)                        | .006   |        | .003   |
|       | N                                      | 21     | 21     | 21     |
| q13_3 | Pearson Correlation                    | .787** | .642** | 1      |
|       | Sig. (2-tailed)                        | .000   | .002   |        |
|       | N                                      | 21     | 21     | 21     |
|       | Spearman's rho Correlation Coefficient | .818** | .611** | 1.000  |
|       | Sig. (2-tailed)                        | .000   | .003   |        |
|       | N                                      | 21     | 21     | 21     |

|       |                                        | q21_1  | q21_2  | q21_3  |
|-------|----------------------------------------|--------|--------|--------|
| q21_1 | Pearson Correlation                    | 1      | .880** | .949** |
|       | Sig. (2-tailed)                        |        | .000   | .000   |
|       | N                                      | 21     | 21     | 21     |
|       | Spearman's rho Correlation Coefficient | 1.000  | .880** | .946** |
|       | Sig. (2-tailed)                        |        | .000   | .000   |
|       | N                                      | 21     | 21     | 21     |
| q21_2 | Pearson Correlation                    | .880** | 1      | .931** |
|       | Sig. (2-tailed)                        | .000   |        | .000   |
|       | N                                      | 21     | 21     | 21     |
|       | Spearman's rho Correlation Coefficient | .880** | 1.000  | .930** |
|       | Sig. (2-tailed)                        | .000   |        | .000   |
|       | N                                      | 21     | 21     | 21     |
| q21_3 | Pearson Correlation                    | .949** | .931** | 1      |
|       | Sig. (2-tailed)                        | .000   | .000   |        |
|       | N                                      | 21     | 21     | 21     |
|       | Spearman's rho Correlation Coefficient | .946** | .930** | 1.000  |
|       | Sig. (2-tailed)                        | .000   | .000   |        |
|       | N                                      | 21     | 21     | 21     |

|       |                                        | q22_1  | q22_2  | q22_3  |
|-------|----------------------------------------|--------|--------|--------|
| q22_1 | Pearson Correlation                    | 1      | .886** | .872** |
|       | Sig. (2-tailed)                        |        | .000   | .000   |
|       | N                                      | 21     | 21     | 21     |
|       | Spearman's rho Correlation Coefficient | 1.000  | .849** | .821** |
|       | Sig. (2-tailed)                        |        | .000   | .000   |
|       | N                                      | 21     | 21     | 21     |
| q22_2 | Pearson Correlation                    | .886** | 1      | .882** |
|       | Sig. (2-tailed)                        | .000   |        | .000   |

|       |                                        |        |        |        |
|-------|----------------------------------------|--------|--------|--------|
|       | N                                      | 21     | 21     | 21     |
|       | Spearman's rho Correlation Coefficient | .849** | 1.000  | .836** |
|       | Sig. (2-tailed)                        | .000   |        | .000   |
|       | N                                      | 21     | 21     | 21     |
| q22_3 | Pearson Correlation                    | .872** | .882** | 1      |
|       | Sig. (2-tailed)                        | .000   | .000   |        |
|       | N                                      | 21     | 21     | 21     |
|       | Spearman's rho Correlation Coefficient | .821** | .836** | 1.000  |
|       | Sig. (2-tailed)                        | .000   | .000   |        |
|       | N                                      | 21     | 21     | 21     |

|       |                                        | q23_1  | q23_2  | q23_3  |
|-------|----------------------------------------|--------|--------|--------|
| q23_1 | Pearson Correlation                    | 1      | .855** | .881** |
|       | Sig. (2-tailed)                        |        | .000   | .000   |
|       | N                                      | 21     | 21     | 21     |
|       | Spearman's rho Correlation Coefficient | 1.000  | .865** | .907** |
|       | Sig. (2-tailed)                        |        | .000   | .000   |
|       | N                                      | 21     | 21     | 21     |
| q23_2 | Pearson Correlation                    | .855** | 1      | .888** |
|       | Sig. (2-tailed)                        | .000   |        | .000   |
|       | N                                      | 21     | 21     | 21     |
|       | Spearman's rho Correlation Coefficient | .865** | 1.000  | .866** |
|       | Sig. (2-tailed)                        | .000   |        | .000   |
|       | N                                      | 21     | 21     | 21     |
| q23_3 | Pearson Correlation                    | .881** | .888** | 1      |
|       | Sig. (2-tailed)                        | .000   | .000   |        |
|       | N                                      | 21     | 21     | 21     |
|       | Spearman's rho Correlation Coefficient | .907** | .866** | 1.000  |
|       | Sig. (2-tailed)                        | .000   | .000   |        |
|       | N                                      | 21     | 21     | 21     |

|       |                                        | q24_1  | q24_2  | q24_3  |
|-------|----------------------------------------|--------|--------|--------|
| q24_1 | Pearson Correlation                    | 1      | .735** | .806** |
|       | Sig. (2-tailed)                        |        | .000   | .000   |
|       | N                                      | 21     | 21     | 21     |
|       | Spearman's rho Correlation Coefficient | 1.000  | .813** | .865** |
|       | Sig. (2-tailed)                        |        | .000   | .000   |
|       | N                                      | 21     | 21     | 21     |
| q24_2 | Pearson Correlation                    | .735** | 1      | .863** |
|       | Sig. (2-tailed)                        | .000   |        | .000   |
|       | N                                      | 21     | 21     | 21     |
|       | Spearman's rho Correlation Coefficient | .813** | 1.000  | .822** |
|       | Sig. (2-tailed)                        | .000   |        | .000   |
|       | N                                      | 21     | 21     | 21     |
| q24_3 | Pearson Correlation                    | .806** | .863** | 1      |
|       | Sig. (2-tailed)                        | .000   | .000   |        |
|       | N                                      | 21     | 21     | 21     |

|  |                                        |        |        |       |
|--|----------------------------------------|--------|--------|-------|
|  | Spearman's rho Correlation Coefficient | .865** | .822** | 1.000 |
|  | Sig. (2-tailed)                        | .000   | .000   |       |
|  | N                                      | 21     | 21     | 21    |

|       |                                        | q25_1  | q25_2  | q25_3  |
|-------|----------------------------------------|--------|--------|--------|
| q25_1 | Pearson Correlation                    | 1      | .891** | .920** |
|       | Sig. (2-tailed)                        |        | .000   | .000   |
|       | N                                      | 21     | 21     | 21     |
|       | Spearman's rho Correlation Coefficient | 1.000  | .865** | .932** |
|       | Sig. (2-tailed)                        |        | .000   | .000   |
|       | N                                      | 21     | 21     | 21     |
| q25_2 | Pearson Correlation                    | .891** | 1      | .935** |
|       | Sig. (2-tailed)                        | .000   |        | .000   |
|       | N                                      | 21     | 21     | 21     |
|       | Spearman's rho Correlation Coefficient | .865** | 1.000  | .942** |
|       | Sig. (2-tailed)                        | .000   |        | .000   |
|       | N                                      | 21     | 21     | 21     |
| q25_3 | Pearson Correlation                    | .920** | .935** | 1      |
|       | Sig. (2-tailed)                        | .000   | .000   |        |
|       | N                                      | 21     | 21     | 21     |
|       | Spearman's rho Correlation Coefficient | .932** | .942** | 1.000  |
|       | Sig. (2-tailed)                        | .000   | .000   |        |
|       | N                                      | 21     | 21     | 21     |

|       |                                        | q26_1  | q26_2  | q26_3  |
|-------|----------------------------------------|--------|--------|--------|
| q26_1 | Pearson Correlation                    | 1      | .808** | .831** |
|       | Sig. (2-tailed)                        |        | .000   | .000   |
|       | N                                      | 21     | 21     | 21     |
|       | Spearman's rho Correlation Coefficient | 1.000  | .837** | .787** |
|       | Sig. (2-tailed)                        |        | .000   | .000   |
|       | N                                      | 21     | 21     | 21     |
| q26_2 | Pearson Correlation                    | .808** | 1      | .796** |
|       | Sig. (2-tailed)                        | .000   |        | .000   |
|       | N                                      | 21     | 21     | 21     |
|       | Spearman's rho Correlation Coefficient | .837** | 1.000  | .799** |
|       | Sig. (2-tailed)                        | .000   |        | .000   |
|       | N                                      | 21     | 21     | 21     |
| q26_3 | Pearson Correlation                    | .831** | .796** | 1      |
|       | Sig. (2-tailed)                        | .000   | .000   |        |
|       | N                                      | 21     | 21     | 21     |
|       | Spearman's rho Correlation Coefficient | .787** | .799** | 1.000  |
|       | Sig. (2-tailed)                        | .000   | .000   |        |
|       | N                                      | 21     | 21     | 21     |

|       |                     | q31_1 | q31_2 | q31_3  |
|-------|---------------------|-------|-------|--------|
| q31_1 | Pearson Correlation | 1     | .504* | .747** |
|       | Sig. (2-tailed)     |       | .020  | .000   |

|       |                                        |        |        |        |
|-------|----------------------------------------|--------|--------|--------|
|       | N                                      | 21     | 21     | 21     |
|       | Spearman's rho Correlation Coefficient | 1.000  | .472*  | .727** |
|       | Sig. (2-tailed)                        |        | .031   | .000   |
|       | N                                      | 21     | 21     | 21     |
| q31_2 | Pearson Correlation                    | .504*  | 1      | .823** |
|       | Sig. (2-tailed)                        | .020   |        | .000   |
|       | N                                      | 21     | 21     | 21     |
|       | Spearman's rho Correlation Coefficient | .472*  | 1.000  | .819** |
|       | Sig. (2-tailed)                        | .031   |        | .000   |
|       | N                                      | 21     | 21     | 21     |
| q31_3 | Pearson Correlation                    | .747** | .823** | 1      |
|       | Sig. (2-tailed)                        | .000   | .000   |        |
|       | N                                      | 21     | 21     | 21     |
|       | Spearman's rho Correlation Coefficient | .727** | .819** | 1.000  |
|       | Sig. (2-tailed)                        | .000   | .000   |        |
|       | N                                      | 21     | 21     | 21     |

|       |                                        | q32_1  | q32_2  | q32_3  |
|-------|----------------------------------------|--------|--------|--------|
| q32_1 | Pearson Correlation                    | 1      | .802** | .846** |
|       | Sig. (2-tailed)                        |        | .000   | .000   |
|       | N                                      | 21     | 21     | 21     |
|       | Spearman's rho Correlation Coefficient | 1.000  | .840** | .867** |
|       | Sig. (2-tailed)                        |        | .000   | .000   |
|       | N                                      | 21     | 21     | 21     |
| q32_2 | Pearson Correlation                    | .802** | 1      | .818** |
|       | Sig. (2-tailed)                        | .000   |        | .000   |
|       | N                                      | 21     | 21     | 21     |
|       | Spearman's rho Correlation Coefficient | .840** | 1.000  | .800** |
|       | Sig. (2-tailed)                        | .000   |        | .000   |
|       | N                                      | 21     | 21     | 21     |
| q32_3 | Pearson Correlation                    | .846** | .818** | 1      |
|       | Sig. (2-tailed)                        | .000   | .000   |        |
|       | N                                      | 21     | 21     | 21     |
|       | Spearman's rho Correlation Coefficient | .867** | .800** | 1.000  |
|       | Sig. (2-tailed)                        | .000   | .000   |        |
|       | N                                      | 21     | 21     | 21     |

|       |                                        | q33_1 | q33_2 | q33_3  |
|-------|----------------------------------------|-------|-------|--------|
| q33_1 | Pearson Correlation                    | 1     | .542* | .765** |
|       | Sig. (2-tailed)                        |       | .011  | .000   |
|       | N                                      | 21    | 21    | 21     |
|       | Spearman's rho Correlation Coefficient | 1.000 | .385  | .670** |
|       | Sig. (2-tailed)                        |       | .085  | .001   |
|       | N                                      | 21    | 21    | 21     |
| q33_2 | Pearson Correlation                    | .542* | 1     | .707** |
|       | Sig. (2-tailed)                        | .011  |       | .000   |
|       | N                                      | 21    | 21    | 21     |

|       |                                        |        |        |        |
|-------|----------------------------------------|--------|--------|--------|
| q33_3 | Spearman's rho Correlation Coefficient | .385   | 1.000  | .666** |
|       | Sig. (2-tailed)                        | .085   |        | .001   |
|       | N                                      | 21     | 21     | 21     |
|       | Pearson Correlation                    | .765** | .707** | 1      |
|       | Sig. (2-tailed)                        | .000   | .000   |        |
|       | N                                      | 21     | 21     | 21     |
|       | Spearman's rho Correlation Coefficient | .670** | .666** | 1.000  |
|       | Sig. (2-tailed)                        | .001   | .001   |        |
|       | N                                      | 21     | 21     | 21     |

\*\* . Correlation is significant at the 0.01 level (2-tailed).
