# Supplementary material
Source: MDPI journal article supplement (https://www.mdpi.com/2199-8531/7/4/218)
Supplement: s1 [file s1]

Archive with 2 entries (2 files):
- Table S1.pdf
- Table S2.pdf
